# Supplementary material
Source: PubMed Central journal article supplement (PMC3382930)
Supplement: supp_blood-2011-12-397489_blood-2011-12-397489-1.pdf [file supp_blood-2011-12-397489_blood-2011-12-397489-1.pdf]

|       |                         | CD4           | CD8            | DP             | DN             | TCR $\beta$    | TCR $\gamma\delta$ |
|-------|-------------------------|---------------|----------------|----------------|----------------|----------------|--------------------|
| Day11 | WT YS                   | 5.0 $\pm$ 1.8 | 1.1 $\pm$ 0.8  | 2.2 $\pm$ 2.7  | 91.7 $\pm$ 4.9 | 1.4 $\pm$ 1.1  | 4.5 $\pm$ 1.7      |
|       | WT PSP                  | 3.5 $\pm$ 1.7 | 0.5 $\pm$ 0.2  | 0.7 $\pm$ 0.6  | 95.4 $\pm$ 1.9 | 0.8 $\pm$ 0.3  | 4.1 $\pm$ 1.9      |
|       | Ncx1 <sup>-/-</sup> YS  | 1.5 $\pm$ 1.8 | 15.1 $\pm$ 10  | 48.9 $\pm$ 34  | 34.5 $\pm$ 33  | 24.5 $\pm$ 29  | 5.8 $\pm$ 5.1      |
|       | Ncx1 <sup>-/-</sup> PSP | 3.9 $\pm$ 5.6 | 7.12 $\pm$ 5.7 | 0.8 $\pm$ 0.6  | 88.2 $\pm$ 5.4 | 0.4 $\pm$ 0.1  | 1.9 $\pm$ 0.4      |
| Day18 | WT YS                   | 4.8 $\pm$ 1.8 | 11 $\pm$ 2.9   | 44.2 $\pm$ 14  | 40.0 $\pm$ 12  | 31.3 $\pm$ 9.6 | 18.7 $\pm$ 0.4     |
|       | WT PSP                  | 4.3 $\pm$ 2.5 | 17.4 $\pm$ 4.4 | 25.6 $\pm$ 18  | 52.6 $\pm$ 16  | 18.0 $\pm$ 6.2 | 29.3 $\pm$ 4.3     |
|       | Ncx1 <sup>-/-</sup> YS  | 4.6 $\pm$ 0.6 | 15.7 $\pm$ 0.8 | 49.5 $\pm$ 1.4 | 30.3 $\pm$ 1.4 | 34 $\pm$ 1.4   | 17.3 $\pm$ 8.8     |
|       | Ncx1 <sup>-/-</sup> PSP | 4.3 $\pm$ 1.1 | 10.0 $\pm$ 0.3 | 46.2 $\pm$ 6.6 | 40.0 $\pm$ 5.9 | 33.6 $\pm$ 3.6 | 6 $\pm$ 2.1        |

**Table S1. Frequency of each cell fraction in cultured YS and P-Sp cells.**

The non-adherent cell supernatant of YS or P-Sp culture was collected and stained with anti-CD4, CD8, TCR $\beta$ , and TCR $\gamma\delta$  antibodies. Percentage of each cell fraction among the live cell gate was depicted.

|        |    | Cell # | Thymus | SPL |
|--------|----|--------|--------|-----|
| WT YS  | DP | 1.2M   | 0/2    | 0/2 |
|        | DN | 0.9M   | 2/2    | 2/2 |
| WT PSP | DP | 1.5M   | 0/2    | 0/2 |
|        | DN | 0.5M   | 1/1    | 1/1 |

**Table S2. DN cells of YS-and P-Sp derived T progenitor cells engraft in the thymus and spleen.**

CD4<sup>+</sup>CD8<sup>+</sup> double positive (DP) cells or double negative (DN) cells derived from YS or P-Sp were injected into NOG neonates and engraftment in recipient thymus and/or spleen was analyzed 2 weeks after injection

|                          | Only B-1 cell engraftment | Only T cell engraftment | No engraftment | Total number of transplant |
|--------------------------|---------------------------|-------------------------|----------------|----------------------------|
| WT YS                    | 5                         | 1 (4ee)                 | 9              | 15                         |
| WT P-Sp                  | 6                         | 0                       | 8              | 14                         |
| Ncx1 <sup>-/-</sup> YS   | 0                         | 2 (2ee)                 | 11             | 13                         |
| Ncx1 <sup>-/-</sup> P-Sp | 0                         | 0                       | 10             | 10                         |

**Table S3. Freshly isolated YS cells engrafted in the recipient NOG neonates with only B or T cell lineage.** Freshly isolated E9.5 YS and P-Sp cells were injected into NOG neonates. 1 to 5 ee of each sample was transplanted. Peripheral blood was examined for engraftment of donor cell type.

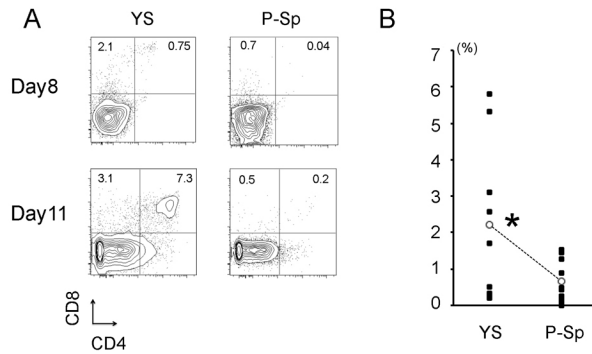

**Figure S1. DP cells appear earlier in the YS culture than in the P-Sp culture.**

E9.5 YS and P-Sp cells were cultured on OP9-DL1 and the supernatant was analyzed.

(A) Time course appearance of cell types in the supernatant of the YS (left) and P-Sp (right) culture. A representative FACS dot plot is depicted. (B) Percentage of DP cells at day 11 culture of YS and P-Sp. YS culture produced more DP cells than P-Sp culture at this time point. ( $p < 0.05$ ,  $n = 11$ )

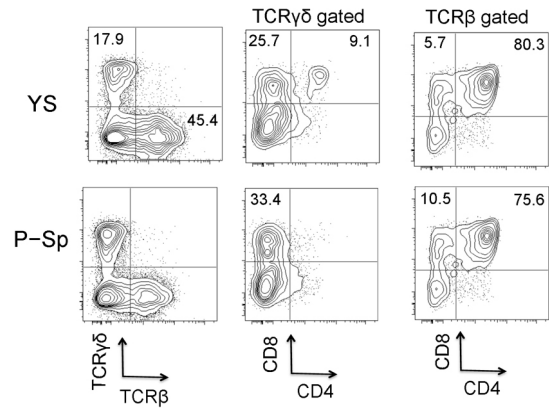

**Figure S2. TCR $\alpha\beta$ <sup>+</sup> and TCR $\gamma\delta$ <sup>+</sup> cell phenotypes on day18 YS and P-Sp culture with OP9-DL1.**

E9.5 YS and P-Sp cells were cultured on OP9-DL1 and the supernatant was analyzed on day 18 of co-culture. There were good number of TCR $\alpha\beta$ <sup>+</sup> and TCR $\gamma\delta$ <sup>+</sup> cells and the expression of CD4 or CD8 was examined in each TCR<sup>+</sup> cells. Representative FACS dot plots are depicted from 3 independent experiments for each YS and P-Sp culture.

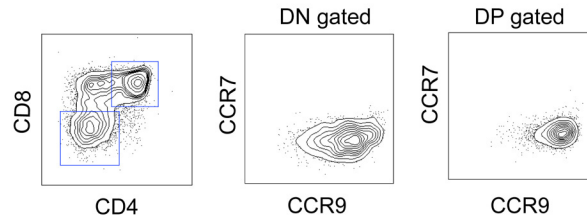

**Figure S3. Cultured DP and DN cells derived from YS and P-Sp express CXCR9.**

DP and DN cells derived from YS and P-SP on OP9-DL1 culture were stained with monoclonal antibodies for thymic homing receptor, CCR7 and CCR9. Both DP and DN cells expressed CXCR9. One representative FACS dot plot of YS is depicted. P-Sp derived cells showed similar phenotype with YS-derived cells (n=3).

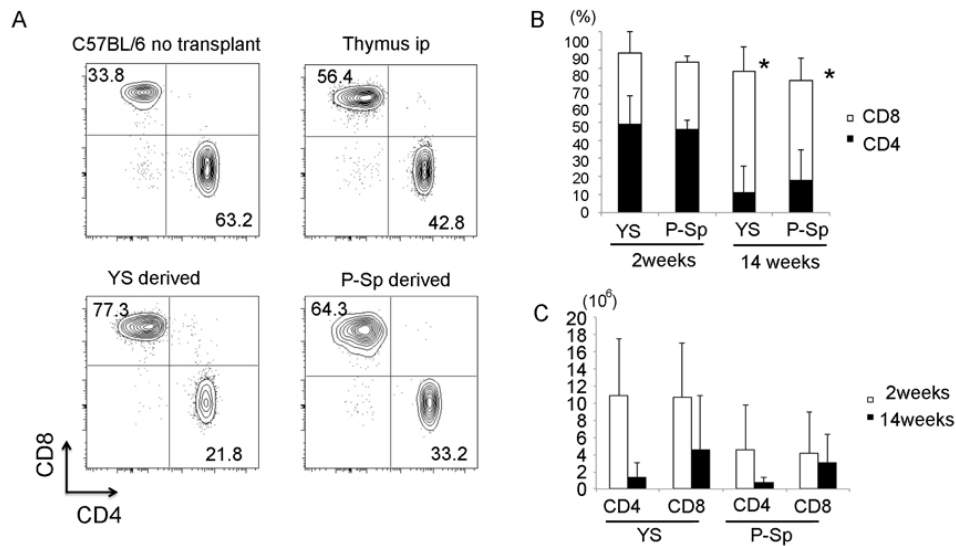

**Figure S4. Donor CD4/8 ratio declined over time after transplantation.**

(A) CD4 and CD8 ratio in the spleen. Upper left: spleen from normal C57BL/6 mouse. Upper right: spleen from NOG mice transplanted with adult thymic cells, 32 weeks after injection. Lower left: spleen from NOG mice transplanted with YS-derived T cells, 14 weeks after injection. Lower right: spleen from NOG mice transplanted with P-Sp-derived T cells, 14 weeks after injection. All dot plots were within TCR $\beta^+$  population. (B) Percentages of CD4 and CD8 expressing cells in donor derived TCR $\beta^+$  cells in the recipient spleen. The percentage of CD4 was significantly decreased at 14 weeks compared at 2 weeks ( $p < 0.05$ ). (C) Total numbers of YS and P-Sp derived CD4 $^+$  and CD8 $^+$  cells in the recipient spleen.
